# Supplementary material for: Incorporation of Fe3+ into Mg/Al layered double hydroxide framework: effects on textural properties and photocatalytic activity for H2 generation
Source: Royal Society of Chemistry journal article supplement (doi:10.1039/c2jm15658j), 2012-01-01
Supplement: c2jm15658j.pdf [file c2jm15658j.pdf]

### Supplementary information

## **Incorporation of $\text{Fe}^{3+}$ into Mg/Al Layered double hydroxide Framework; effects on textural properties and photocatalytic activity for $\text{H}_2$ generation**

**Kulamani Parida\*, Minarva Satpathy, Lagnamayee Mohapatra**

Colloids & Materials Chemistry Department, CSIR-Institute of Minerals & Materials  
Technology, Bhubaneswar-751013, Orissa, India

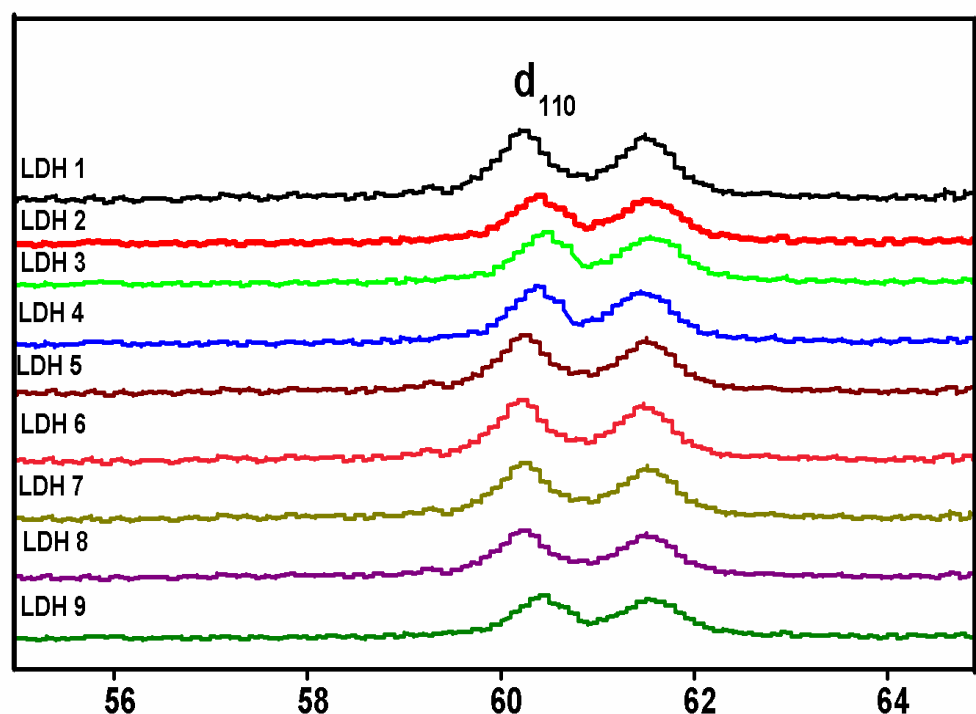

Fig. S1. High angle X-ray diffraction patterns of Mg/Al/Fe- $\text{CO}_3$  LDHs with different molar ratios.

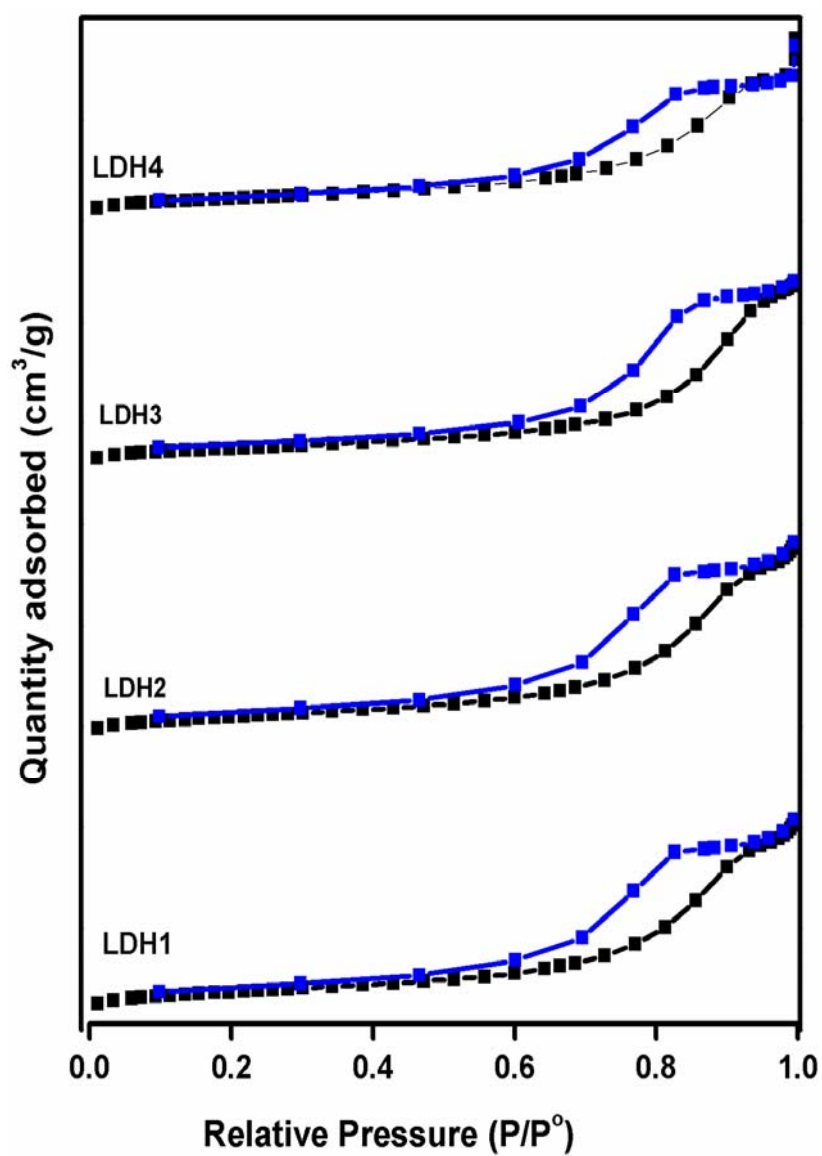

Fig. S2. N<sub>2</sub> adsorption desorption curves of Mg/Al/Fe-CO<sub>3</sub> LDHs with different molar ratios.

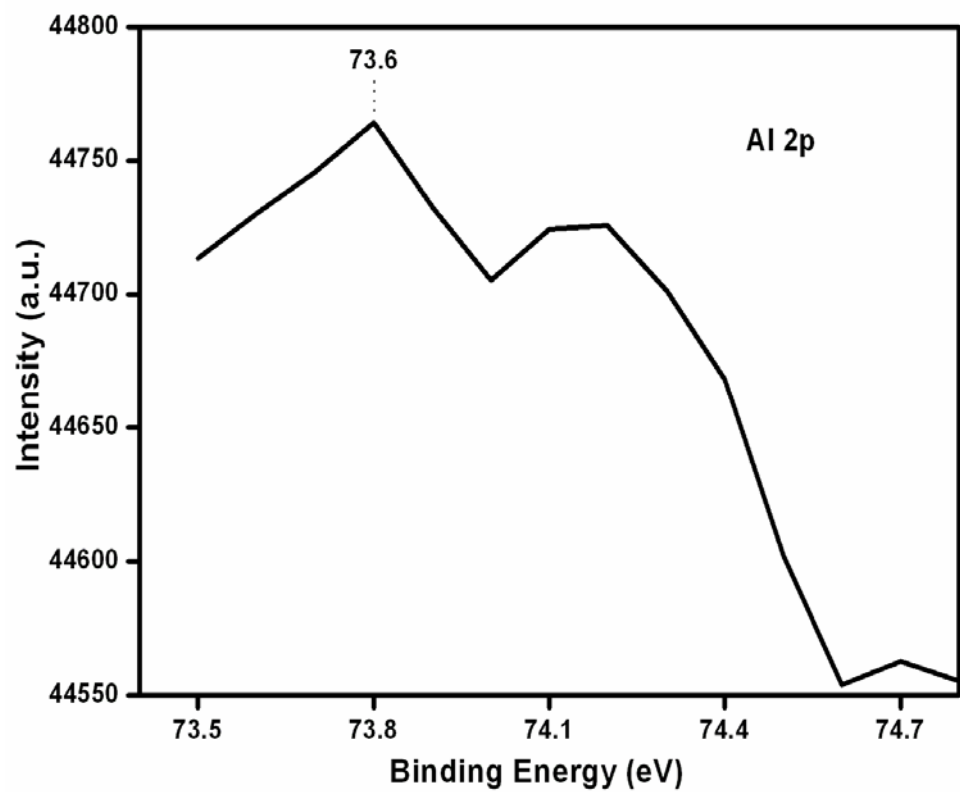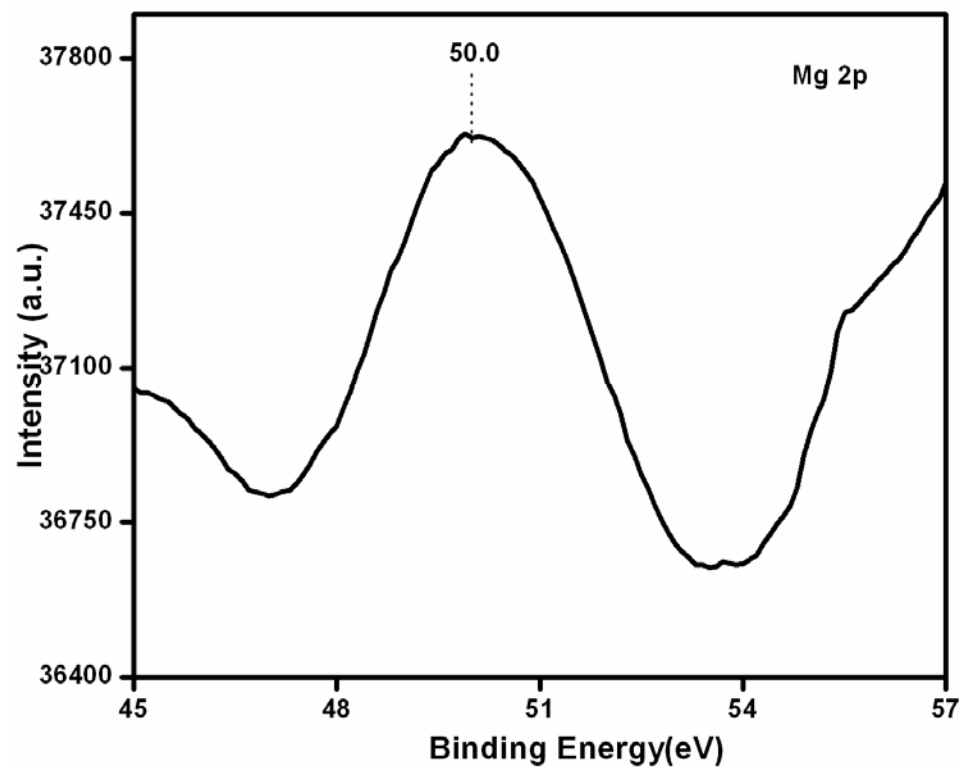

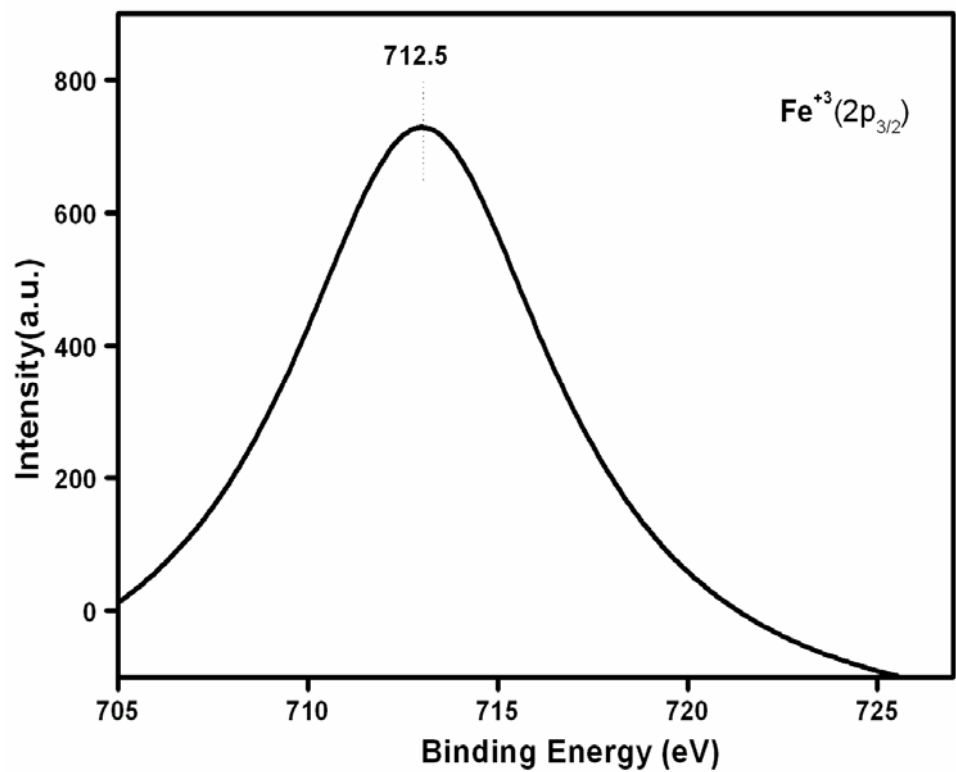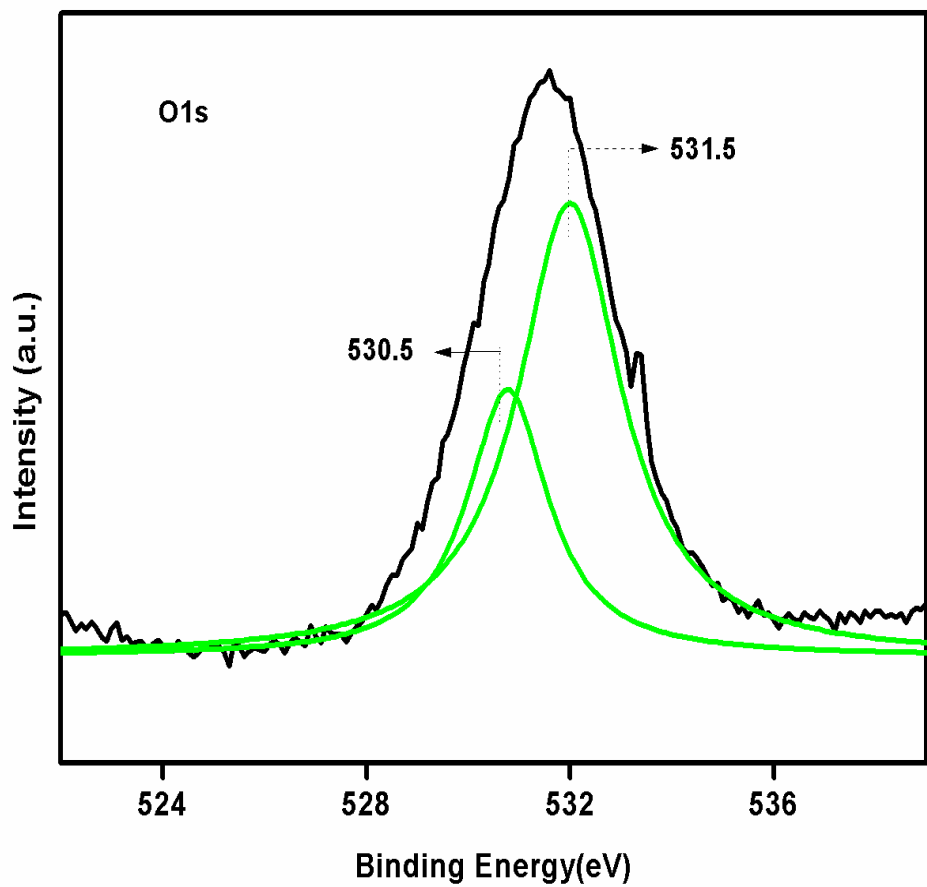

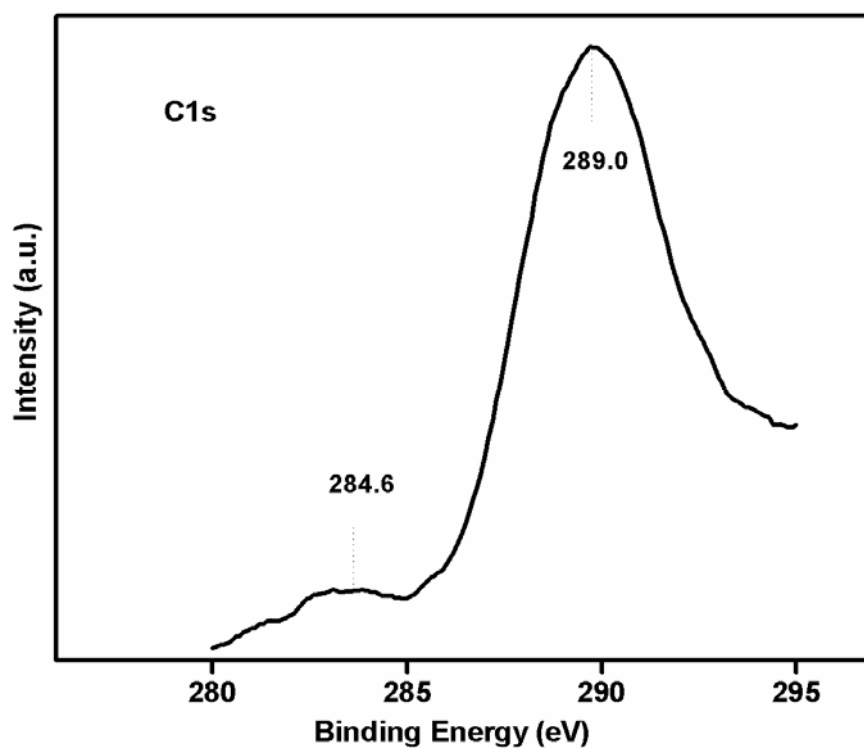

Fig. S3. XPS spectra of Mg/Al/Fe-CO<sub>3</sub> (2:1) LDH .

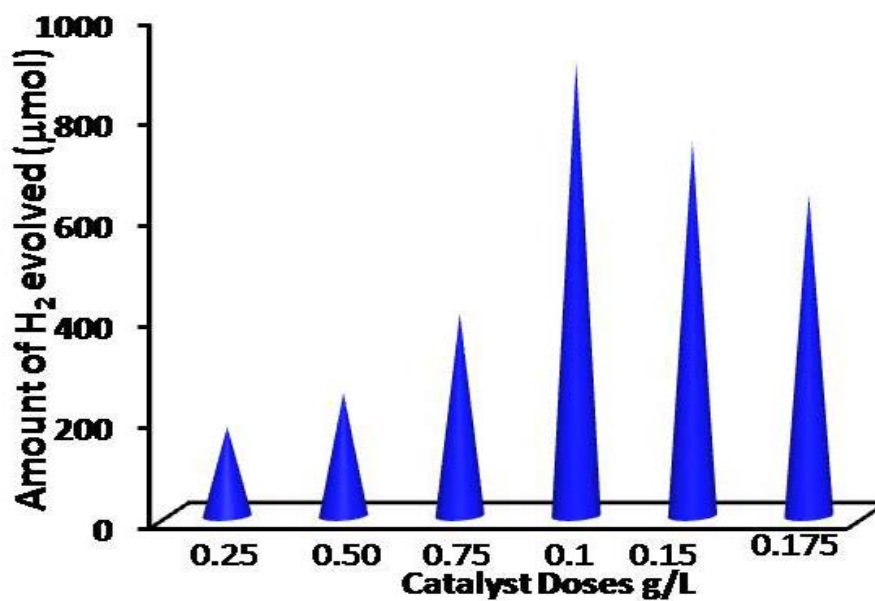

Fig.S4. Volume of hydrogen evolution obtained for Mg/Al/Fe-CO<sub>3</sub> (2:1) LDH with different catalyst doses.

| <b>LDH</b>              | <b>Mol</b>                                                     | <b><u>Composition<sup>e</sup></u></b>                           | <b>Average</b>                      | <b>Surface</b>                              |
|-------------------------|----------------------------------------------------------------|-----------------------------------------------------------------|-------------------------------------|---------------------------------------------|
| <b><u>Materials</u></b> | <b><u>Mg<sup>2+</sup>/Al<sup>3+</sup> +Fe<sup>3+</sup></u></b> |                                                                 | <b>crystallite</b>                  | <b>area</b>                                 |
|                         |                                                                |                                                                 | <b><u>size (nm)<sup>a</sup></u></b> | <b><u>(m<sup>2</sup>/g)<sup>d</sup></u></b> |
| <b>LDH1</b>             | 10:4+1                                                         | <b>Mg<sub>0.66</sub> Al<sub>0.272</sub> Fe<sub>0.068</sub></b>  | <b>19.98</b>                        | <b>62</b>                                   |
| <b>LDH2</b>             | 10:3+2                                                         | <b>Mg<sub>0.66</sub> Al<sub>0.204</sub> Fe<sub>0.136</sub></b>  | <b>21.9</b>                         | <b>81</b>                                   |
| <b>LDH3</b>             | 10:2+3                                                         | <b>Mg<sub>0.656</sub> Al<sub>0.135</sub> Fe<sub>0.204</sub></b> | <b>22.5</b>                         | <b>83</b>                                   |
| <b>LDH4</b>             | 10:1+4                                                         | <b>Mg<sub>0.65</sub> Al<sub>0.068</sub> Fe<sub>0.273</sub></b>  | <b>22.7</b>                         | <b>105</b>                                  |

<sup>a</sup>Calculated from XRD pattern,s <sup>d</sup>measured from N<sub>2</sub> isotherms and <sup>e</sup>Atomic absorption spectroscopy

Table S1: Average crystallite size and BET surface area values of Mg/Al/Fe-CO<sub>3</sub> LDHs with different molar ratios.
